# Supplementary material for: Direct versus hydrogen-assisted CO dissociation over stepped Ni and Ni3Fe surfaces: a computational investigation
Source: Royal Society of Chemistry journal article supplement (doi:10.1039/c5cp04335b), 2015-01-01
Supplement: c5cp04335b1.pdf [file c5cp04335b1.pdf]

## Supplementary information

# Direct versus hydrogen-assisted CO dissociation over stepped Ni and Ni<sub>3</sub>Fe surfaces: a computational investigation

Kuiwei Yang<sup>a,b</sup>, Minhua Zhang<sup>a,b,\*</sup>, Yingzhe Yu<sup>a,\*</sup>

<sup>a</sup> Key Laboratory for Green Chemical Technology of Ministry of Education,  
R&D Center for Petrochemical Technology, Tianjin University, Tianjin 300072, P. R.  
China

<sup>b</sup> Collaborative Innovation Center of Chemical Science and Engineering (Tianjin),  
Tianjin 300072, P. R. China

\*Corresponding author

Tel.: +86-22-27406119

E-mail address: mhzhangtj@163.com (M. Zhang)

\*Corresponding author

Tel.: +86-22-27405972

E-mail address: yzhyu@tju.edu.cn (Y. Yu)

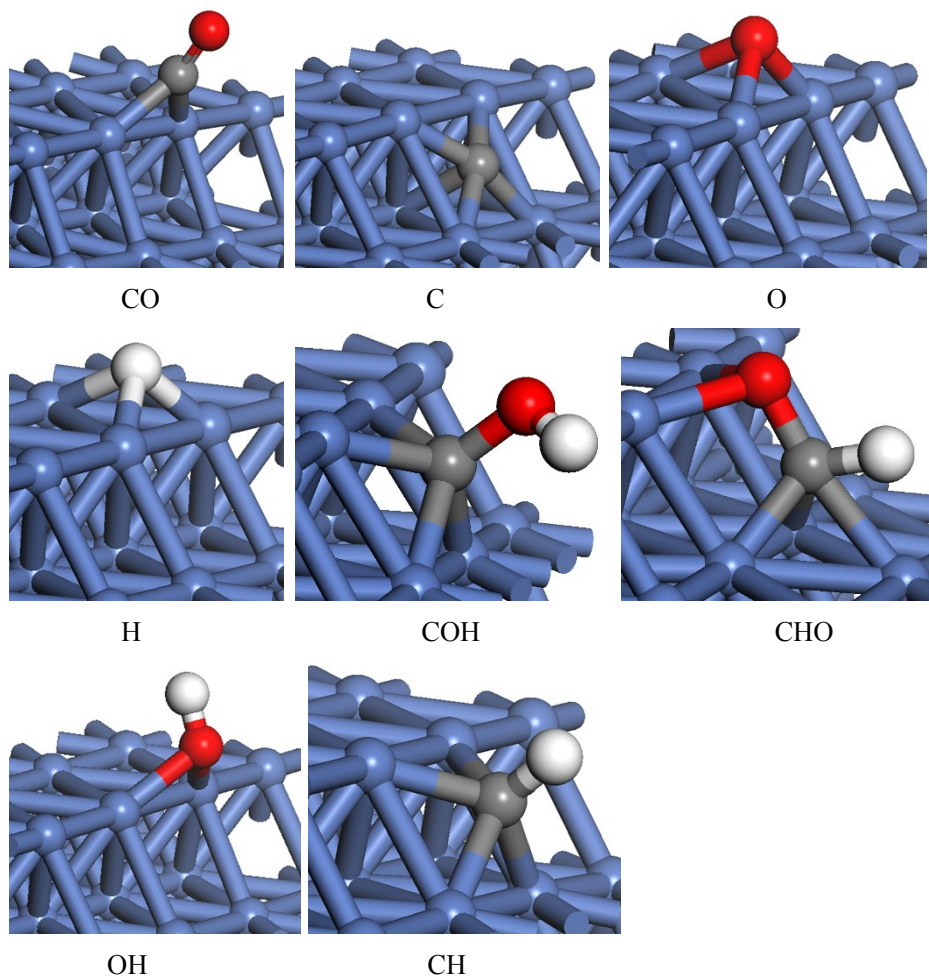

Figure S1. Favoured adsorption configurations of CO and relevant species on Ni(211)

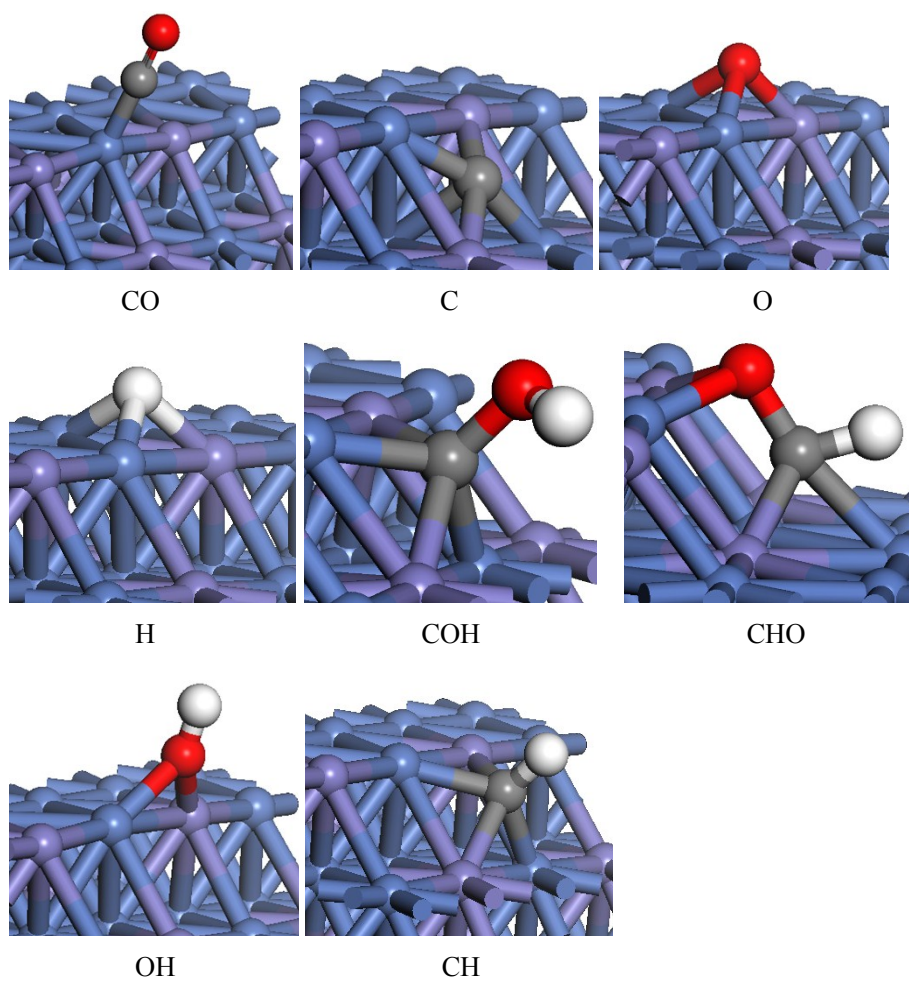

Figure S2. Favored adsorption configurations of CO and relevant species on  $\text{Ni}_3\text{Fe}(211)\text{-AB}$

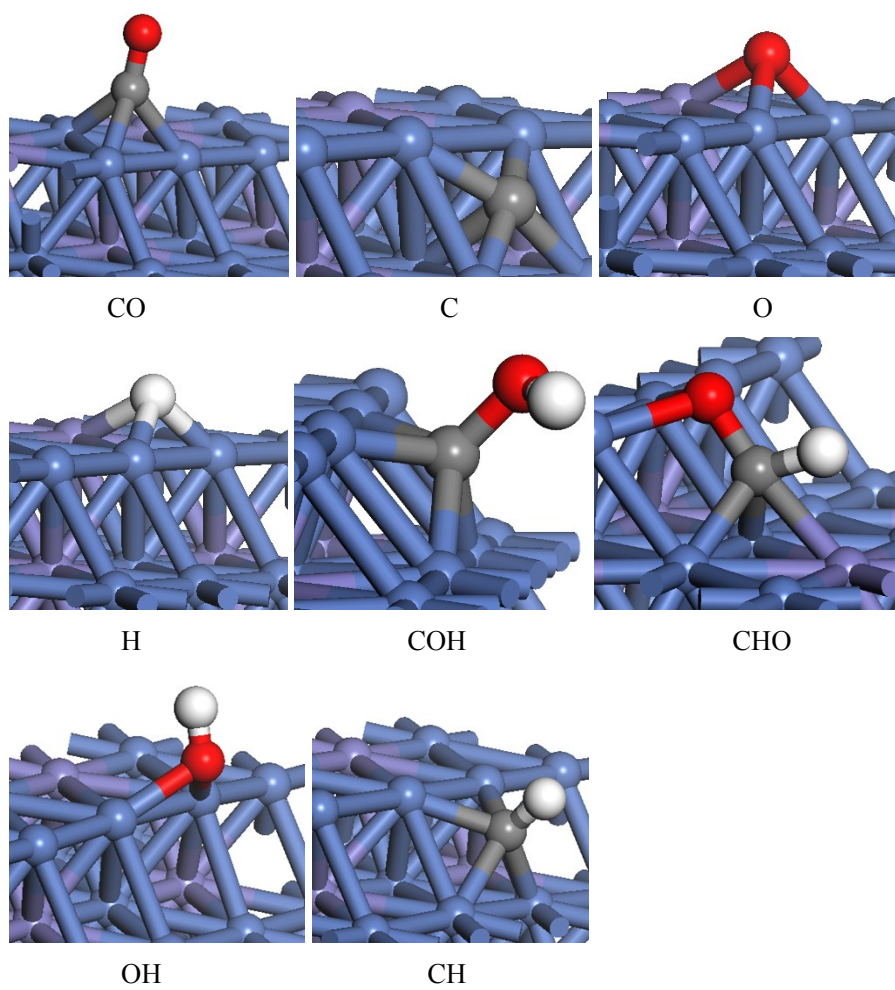

Figure S3. Favoured adsorption configurations of CO and relevant species on  $\text{Ni}_3\text{Fe}(211)\text{-AA}$

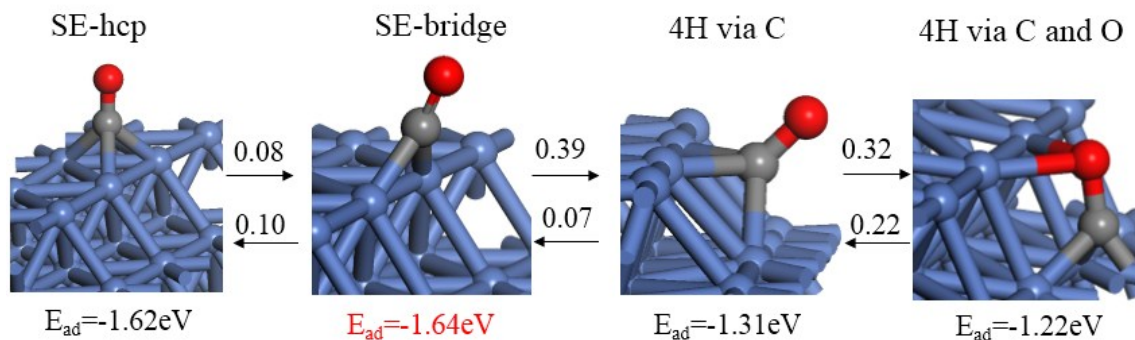

Figure S4. The diffusion of CO between several typical adsorption geometries on Ni(211). The adsorption sites and corresponding adsorption energies are labeled over and below the figures; the diffusion barriers (eV) are marked above the arrows.

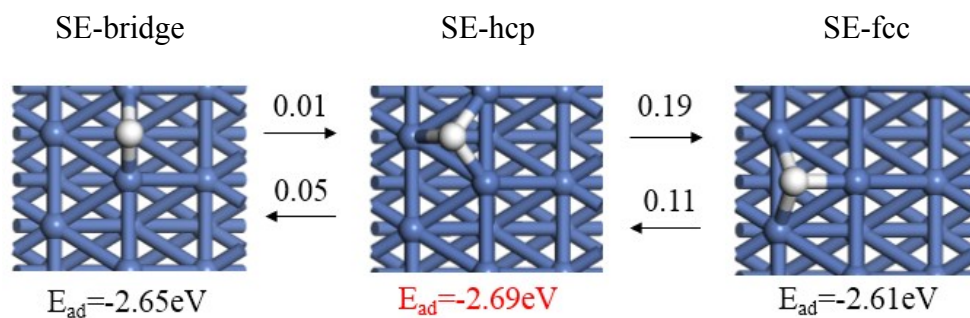

Figure S5. The diffusion of H between several typical adsorption geometries on Ni(211). The adsorption sites and corresponding adsorption energies are labeled over and below the figures; the diffusion barriers (eV) are marked above the arrows.
